# Supplementary material for: Breaking Entry-and Species Barriers: LentiBOOST® Plus Polybrene Enhances Transduction Efficacy of Dendritic Cells and Monocytes by Adenovirus 5
Source: MDPI journal article supplement (doi:10.3390/v14010092), 2022-01-05
Supplement: s1 [file s1]

## Supplementary Information

# Breaking entry- and species barriers: LentiBOOST® plus Polybrene enhances transduction efficacy of dendritic cells and monocytes by adenovirus 5

Astrid Strack<sup>1,\*</sup>, Andrea Deinzer<sup>1,2</sup>, Christian Thirion<sup>3</sup>, Silke Schrödel<sup>3</sup>, Jan Dörrie<sup>4</sup>, Tatjana Sauerer<sup>4</sup>, Alexander Steinkasserer<sup>1</sup> & Ilka Knippertz<sup>1,\*</sup>

Department of Immune Modulation, Universitätsklinikum Erlangen, Friedrich-Alexander Universität Erlangen-Nürnberg, Hartmannstr. 14, 91052 Erlangen, Germany; andrea.deinzer@uk-erlangen.de (A.D.); alexander.steinkasserer@uk-erlangen.de (A.S.)

<sup>2</sup> Institute of Clinical Microbiology, Immunology and Hygiene, Universitätsklinikum Erlangen, Friedrich-Alexander Universität Erlangen-Nürnberg, Wasserturmstraße 3/5, 91054 Erlangen, Germany

<sup>3</sup> SIRION Biotech GmbH, Am Klopferspitz 19, 82152 Martinsried, Germany; Thirion@sirion-biotech.de (C.T.); Schroedel@sirion-biotech.de (S.S.)

<sup>4</sup> Department of Dermatology, Universitätsklinikum Erlangen, Friedrich-Alexander Universität Erlangen-Nürnberg, Hartmannstr. 14, 91052 Erlangen, Germany; Jan.Doerrie@uk-erlangen.de (J.D.); tatjana.sauerer@uk-erlangen.de (T.S.)

\* Correspondence: astrid.strack@uk-erlangen.de (A.S.); ilka.knippertz@uk-erlangen.de (I.K.)

## Supplementary Information

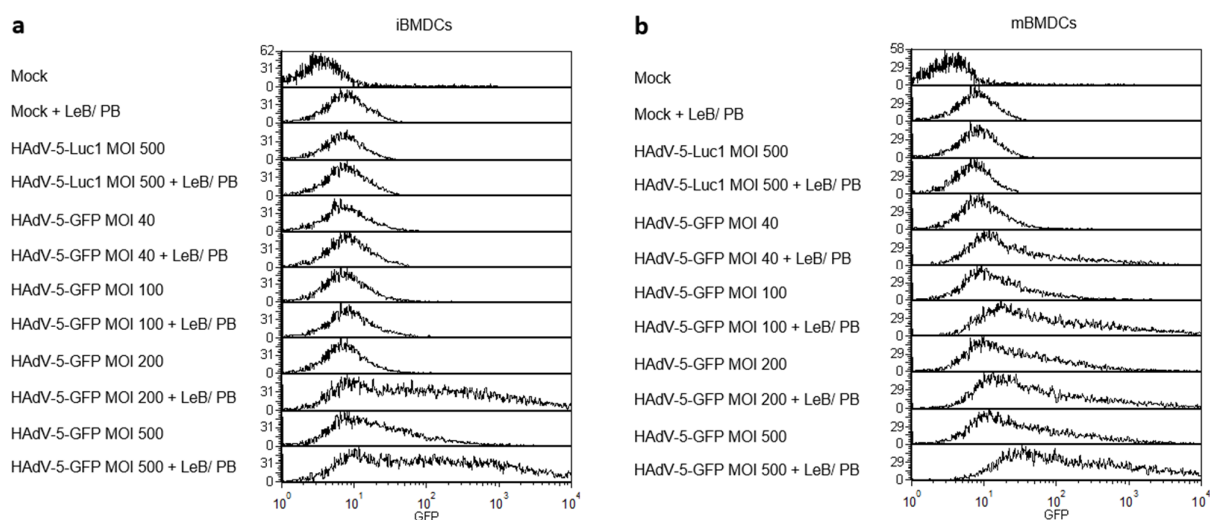

**Supplementary Figure S1.** Distribution of GFP<sup>+</sup> BMDCs. Immature (i)BMDCs (a) and LPS-matured (m)BMDCs (b) were transduced with HAdV-5-GFP at different MOIs in combination with LentiBOOST®/Polybrene (+LeB/PB) or PBS only (-LeB/PB). As a negative control, cells were not transduced ("Mock") or transduced with HAdV-5-Luc1. Values were normalized to peak value. One representative experiment out of four is shown.

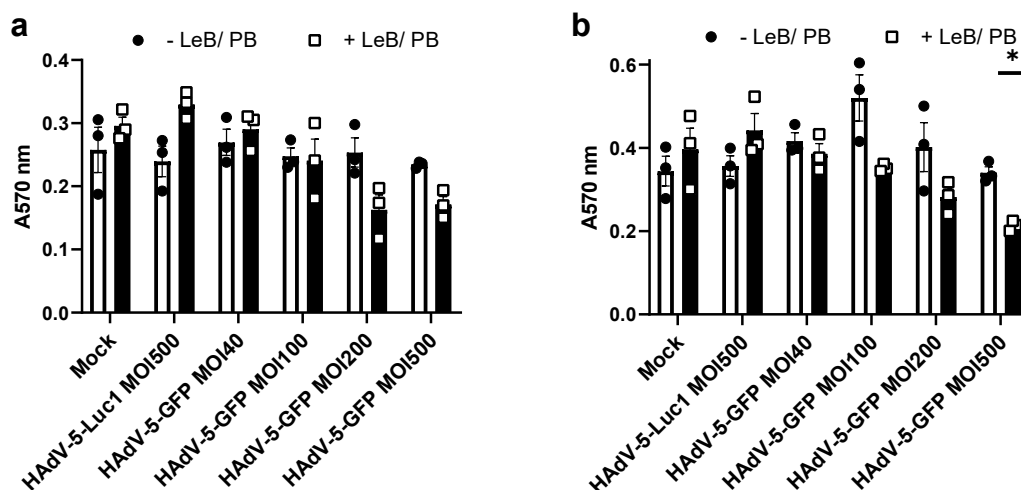

**Supplementary Figure S2.** BMDC viability assessed by an MTT assay. Immature (a) and mature (b) BMDCs were transduced at different MOIs together with LentiBOOST®/Polybrene (+LeB/PB) or PBS (-LeB/PB). Non-transduced ("Mock") or HAdV-5-Luc1 transduced cells served as controls. Twenty-thousand cells were cultivated with 100  $\mu$ g MTT per well for 5 h. Absorbance at 570 nm was measured using a Wallac Victor 2 1420 Multilabel Counter (Perkin Elmer). Data are mean  $\pm$  SEM of three different mice. Two-way ANOVA and Sidak correction were performed. \*  $P < 0.05$ , bars without annotation are not significant ( $P > 0.05$ ) in comparison to the respective condition -LeB/ PB.

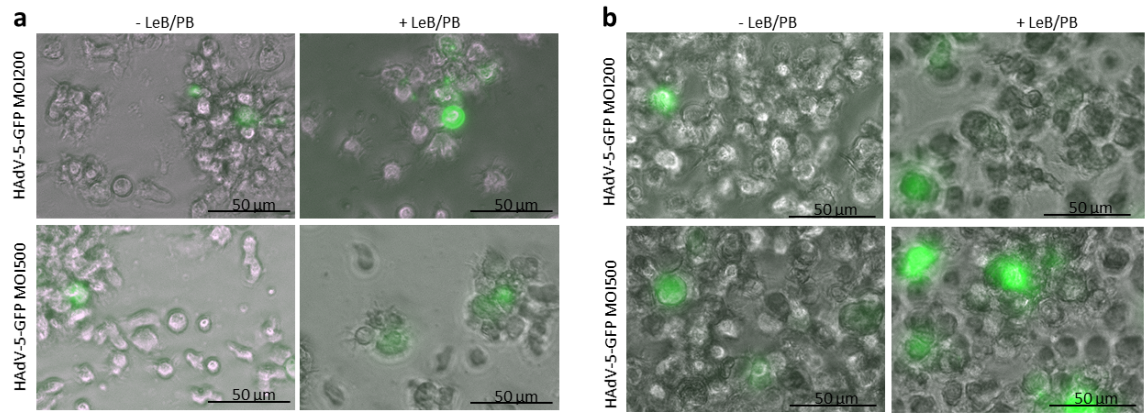

**Supplementary Figure S3:** Morphology of immature (a) and mature (b) murine BMDCs transduced with HAdV-5-GFP with LentiBOOST®/Polybrene +LeB/PB or PBS (-LeB/PB). Images were taken using a Keyence BZ-X800 All-in-one Fluorescence Microscope.

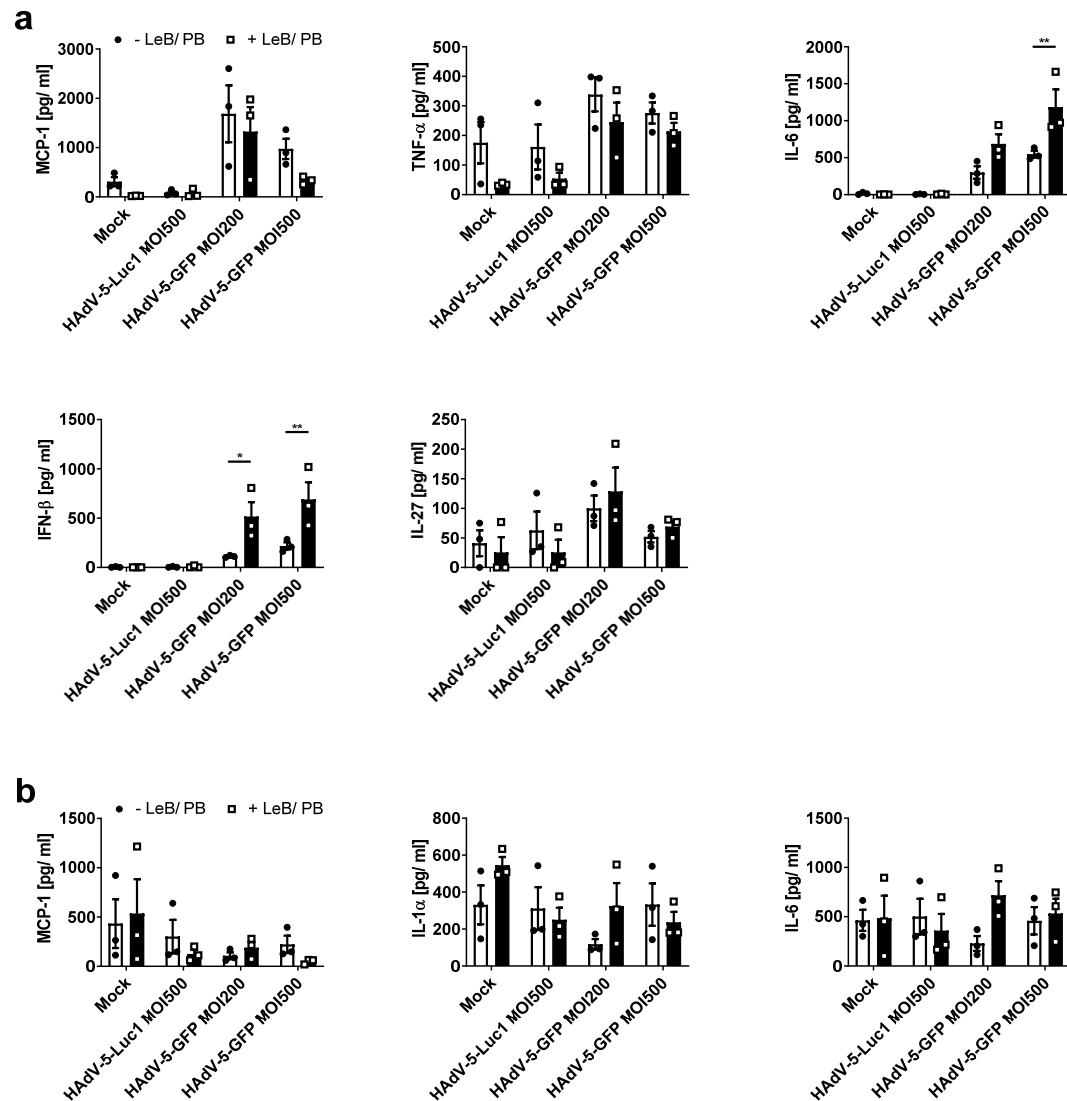

**Supplementary Figure S4.** LentiBOOST®/ Polybrene alters IL-6 and IFN- $\beta$  secretion of immature BMDCs. Immature (a) and LPS-matured (m)BMDCs (b) were transduced with HAdV-5-GFP at different MOIs in combination with LentiBOOST®/ Polybrene (+LeB/ PB) or buffer only (-LeB/ PB), for 48 hours. As a control, cells were not transduced with a virus ("Mock") or using HAdV-5-Luc1. Cell culture supernatants from cells shown in figure 1 were analyzed for their content of cytokines using a cytometric bead array (CBA). Data are mean  $\pm$  SEM of three independent experiments with cells derived from different mice. Two-way ANOVA and Tukey correction were performed. \*  $P < 0.05$ , \*\*  $P < 0.01$ , bars without annotation are not significant ( $P > 0.05$ ) in comparison to the respective condition -LeB/ PB.

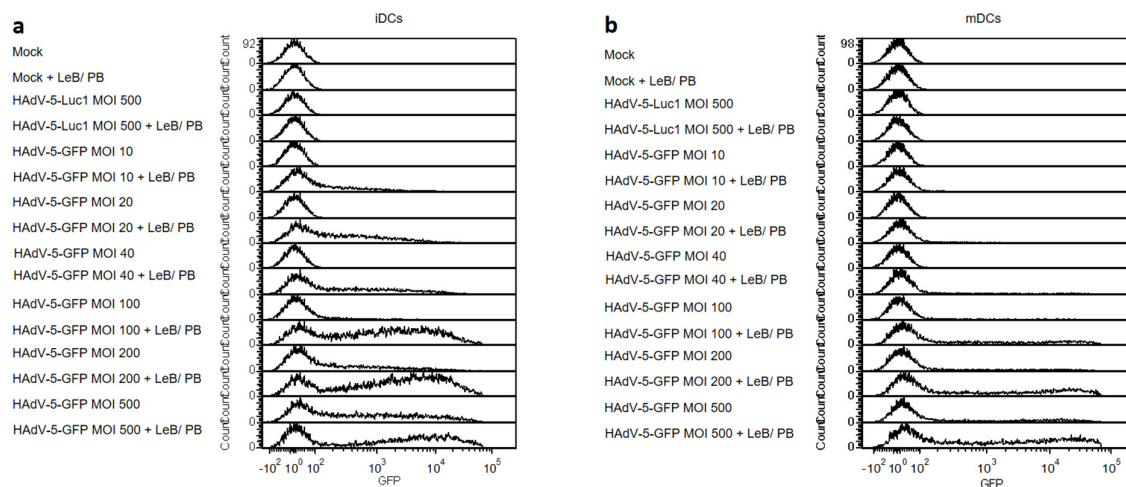

**Supplementary Figure S5.** Distribution of GFP<sup>+</sup> human monocyte-derived DCs. Immature (i)DCs (a) and matured (m)DCs (b) were transduced with HAdV-5-GFP at different MOIs in combination with LentiBOOST®/Polybrene (+LeB/PB) or PBS only (-LeB/PB). Non-transduced ("Mock") or HAdV-5-Luc1-transduced cells served as negative controls. Values were normalized to peak value. One representative experiment out of three is shown.

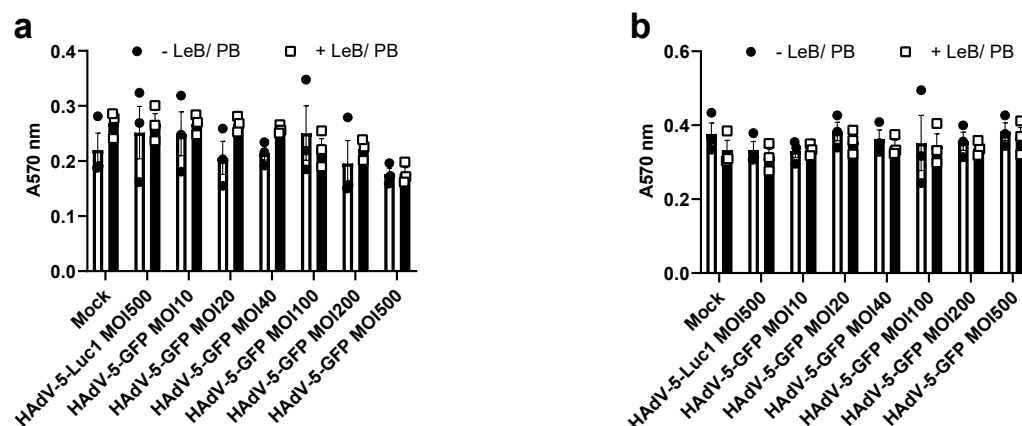

**Supplementary Figure S6.** Human DC viability assessed by an MTT assay. Immature (a) and mature (b) human monocyte-derived DCs were transduced at different MOIs in combination with LentiBOOST®/Polybrene (+LeB/PB) or PBS (-LeB/PB). Non-transduced ("Mock") or HAdV-5-Luc1 transduced cells served as controls. Per condition,  $2 \times 10^4$  cells were cultivated with 100  $\mu$ g MTT per well for 5 h. Absorbance at 570 nm was measured in duplicates using a Wallac Victor 2 1420 Multilabel Counter (Perkin Elmer). Data are mean  $\pm$  SEM of three different mice. Two-way ANOVA and Sidak correction were performed. Bars without annotation are not significant ( $P > 0.05$ ) in comparison to the respective condition -LeB/ PB.

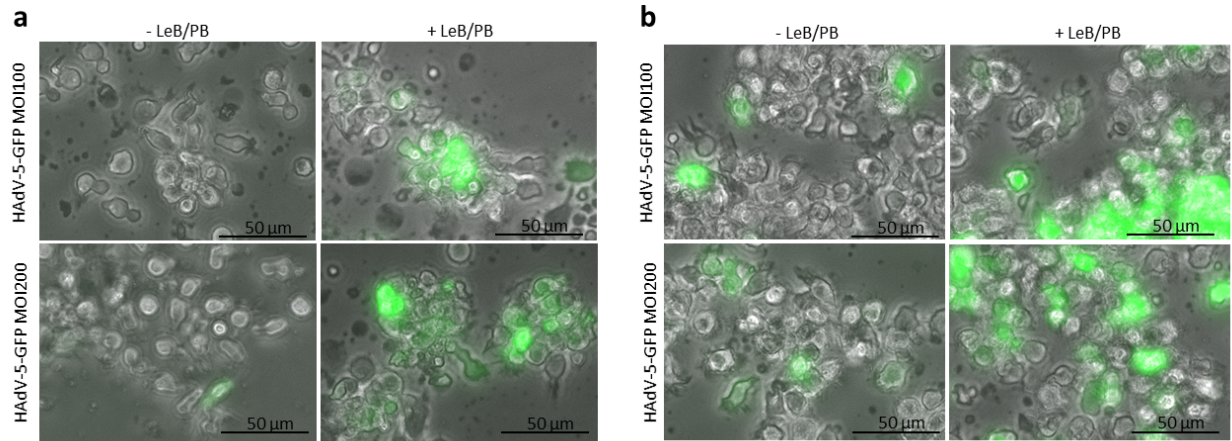

**Supplementary Figure S7:** Morphology of immature (a) and mature (b) human monocyte-derived DCs transduced with HAdV-5-GFP with LentiBOOST®/Polybrene +LeB/PB or PBS (-LeB/PB). Images were taken using a Keyence BZ-X800 All-in-one Fluorescence Microscope.

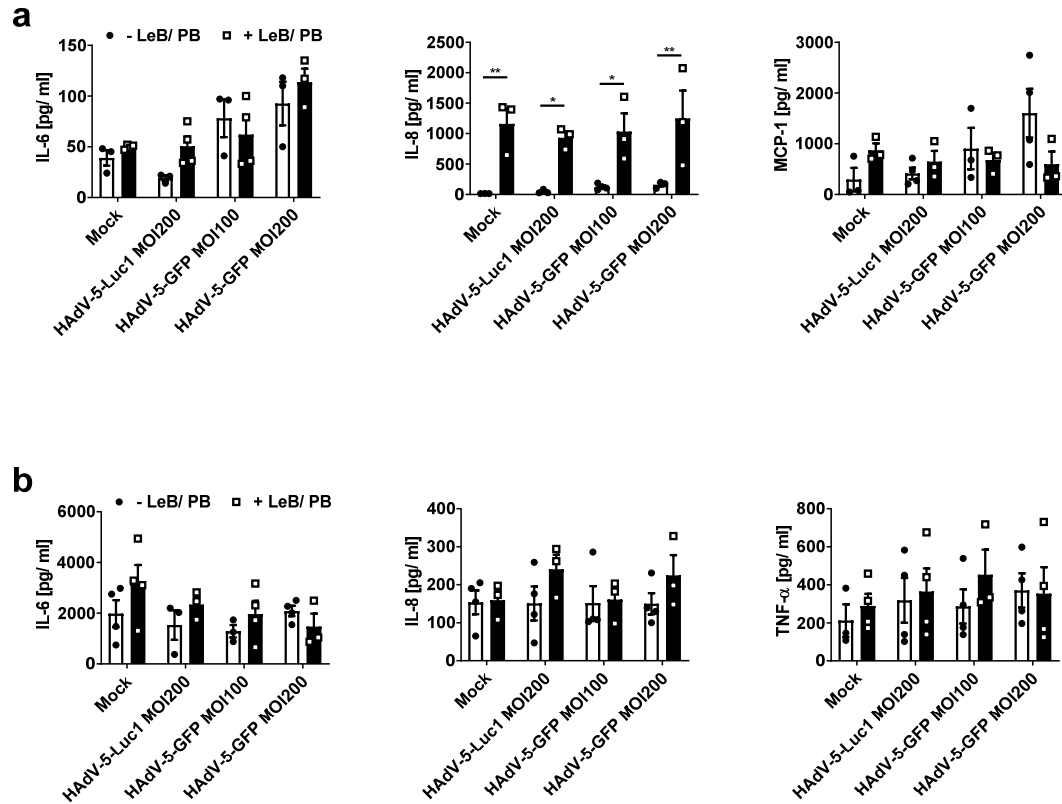

**Supplementary Figure S8.** LentiBOOST®/ Polybrene enhances IL-8 secretion by immature, but not by mature human DCs. Human monocyte-derived immature (i)DCs (**a**) and mature (m)DCs (**b**) were transduced with HAdV-5-Luc1 at a MOI of 200, or with HAdV-5-GFP at a MOI of 100 and 200 in combination with LentiBOOST®/ Polybrene (+LeB/ PB) or buffer only (-LeB/ PB), for 48 hours. Non-transduced cells ("Mock") served as a negative control. Cell culture supernatants from harvested DCs, shown in figure 5, were analyzed for secreted cytokines using CBA. Data are mean  $\pm$  SEM of three independent experiments with cells derived from different healthy donors. Two-way ANOVA and Sidak correction were performed. \*  $P < 0.05$ , \*\*  $P < 0.01$ , bars without annotation are not significant ( $P > 0.05$ ) in comparison to the respective condition -LeB/ PB.

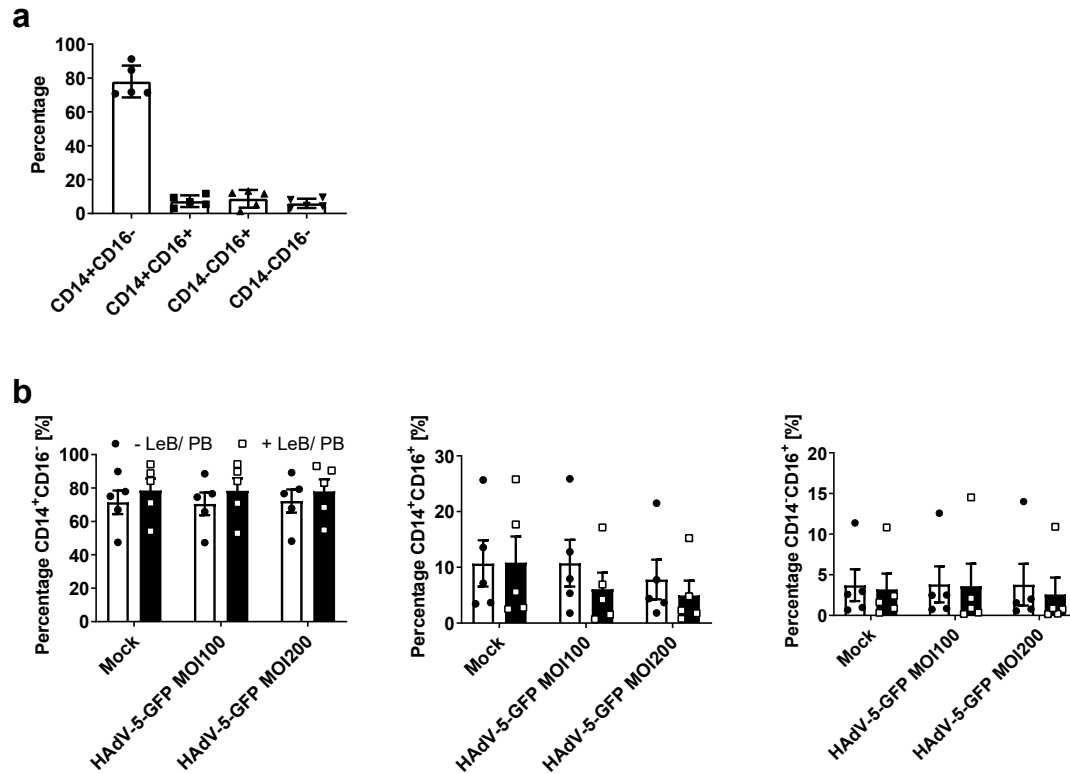

**Supplementary Figure S9.** Differentiation of human monocyte subsets from PBMCs is not influenced by adenoviral transduction facilitated by LentiBOOST®/ Polybrene. Human PBMCs isolated from leukocyte reduction system chambers were analyzed using flow cytometry before and after adenoviral transduction with HAdV-5-GFP. **(a)** Flow cytometric analyses of freshly isolated living 7-AAD negative, lineage negative HLA-DR<sup>+</sup> monocytes, further subdivided into CD14<sup>+</sup>CD16<sup>-</sup> classical monocytes, CD14<sup>+</sup>CD16<sup>+</sup> intermediate monocytes, CD14<sup>-</sup>CD16<sup>+</sup> non-classical monocytes, and CD14<sup>-</sup>CD16<sup>-</sup> DCs. **(b)** Twenty-four hours post adenoviral transduction with an MOI of 100 or 200 in the presence of LentiBOOST®/ Polybrene (+LeB/ PB) or buffer only (-LeB/ PB), cells were analyzed using flow cytometry as described above. Non-transduced ("Mock") cells served as a control. Data are mean  $\pm$  SEM for five different experiments. Two-way ANOVA and Sidak correction were performed. Bars without annotation are not significant ( $P > 0.05$ ) in comparison to the respective condition without LeB/ PB.

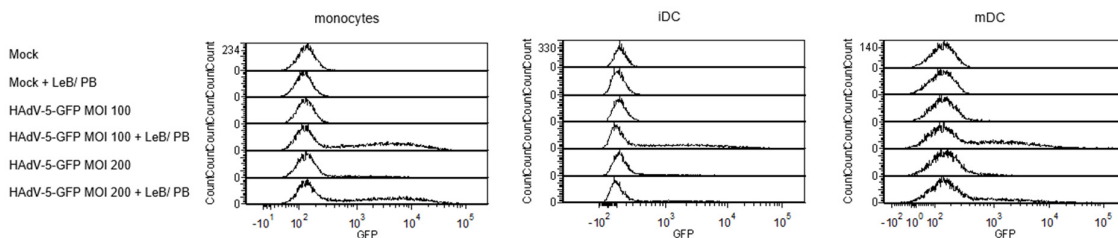

**Supplementary Figure S10.** Distribution of GFP<sup>+</sup> human monocytes and monocyte-derived DCs. Human monocytes were transduced with HAdV-5-GFP at different MOIs in combination with LentiBOOST®/Polybrene (+LeB/PB) or PBS only (-LeB/PB) (left panel) and subsequently differentiated into immature (middle panel) and mature (right panel) DCs. Non-transduced ("Mock") or HAdV-5-Luc1-transduced cells served as negative controls. Depicted is the distribution of GFP signal normalized to the peak value. One representative experiment out of five is shown.

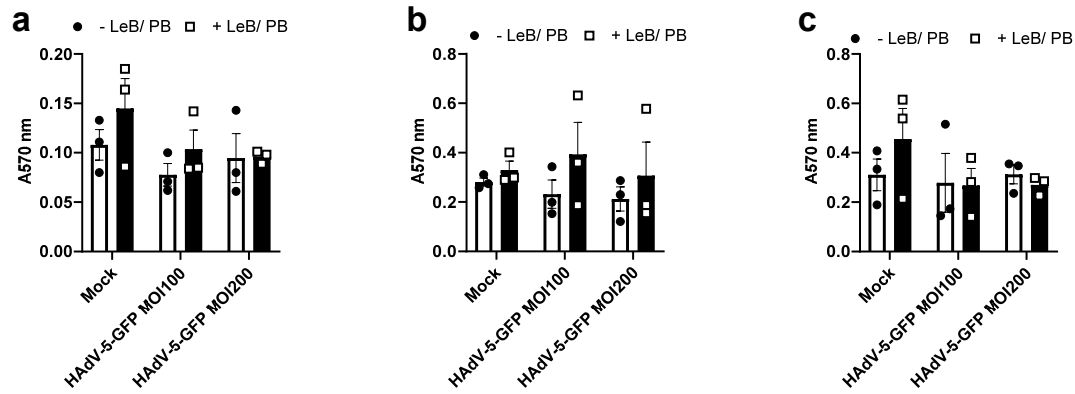

**Supplementary Figure S11.** Viability of Monocytes assessed by a MTT assay. Human monocytes (a) were transduced at different MOIs in combination with LentiBOOST®/Polybrene (+LeB/PB) or PBS (-LeB/PB). Non-transduced ("Mock") or HAΔV-5-Luc1 transduced cells served as controls. Transduced monocytes were further differentiated into immature (b) and mature (c) DCs. Per condition,  $2 \times 10^4$  cells were cultivated with 100  $\mu$ g MTT per well for 5 h. Absorbance at 570 nm was measured in duplicates using a Wallac Victor 2 1420 Multilabel Counter (Perkin Elmer). Data are mean  $\pm$  SEM of three different mice. Two-way ANOVA and Sidak correction were performed. Bars without annotation are not significant ( $P > 0.05$ ) in comparison to the respective condition -LeB/PB.

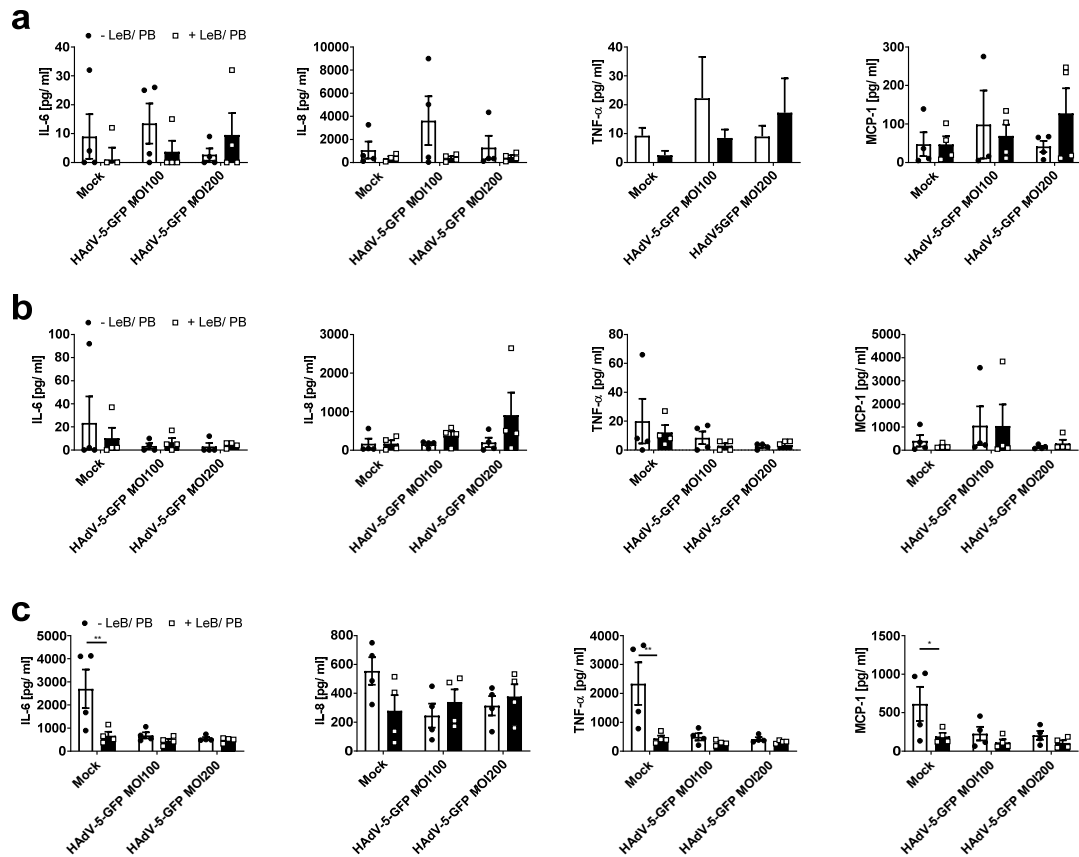



**Supplementary Figure S12.** LentiBOOST®/ Polybrene alters secretion of pro-inflammatory cytokines in untransduced mDCs. Monocytes were not transduced (“Mock”) or transduced with HAdV-5-GFP (MOI100 and MOI200) using LentiBOOST®/ Polybrene (+LeB/ PB) or buffer only (-LeB/ PB). Afterwards differentiation of monocytes into iDCs was induced by adding GM-CSF and IL-4 for 4 days to the cell culture. Addition of IL-1 $\beta$ , IL-6, TNF  $\alpha$ , and PGE2 for another 24 hours resulted in mDCs. **(a-c)** Cytometric bead array (CBA) of cell culture supernatants to determine the cytokine content derived from monocytes 24 hours post infection **(a)**, iDCs at day 4 **(b)** and mDCs at day 5 **(c)**, shown in figure 7. Data are mean  $\pm$  SEM of three different experiments. Two-way ANOVA and Sidak correction were performed. \*  $P < 0.05$ , \*\*  $P < 0.01$ , bars without annotation are not significant ( $P > 0.05$ ) in comparison to the respective condition -LeB/ PB.

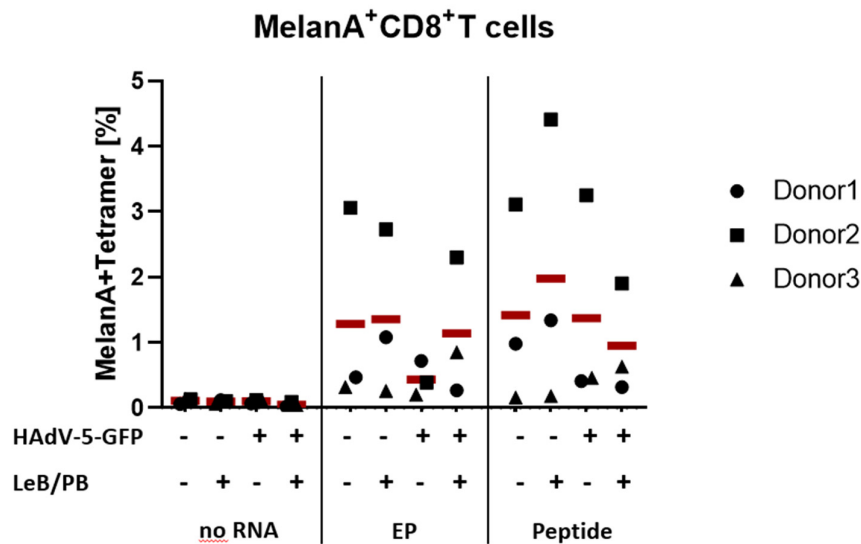

**Supplementary Figure S13.** Mature DCs derived from transduced monocytes retain their capability to prime autologous T cells in a tumor-antigen-specific manner. DCs treated as described in figure 8, were used to stimulate autologous CD8<sup>+</sup> T cells at a 1:10 ratio. One week after stimulation, the percentage of MelanA-specific T cells was analyzed by tetramer-staining and flow-cytometry. The indicated percentage is calculated in reference to all CD8<sup>+</sup> T cells. Data are mean of three independent experiments with cells derived from different healthy HLA A2+ donors. Two-way ANOVA and Sidak correction were performed. Bars without annotation are not significant ( $P > 0.05$ ) in comparison to the respective condition -LeB/ PB.
